# Supplementary material for: Bifidobacterium and Lactobacillus Counts in the Gut Microbiota of Patients With Bipolar Disorder and Healthy Controls
Source: PubMed Central journal article supplement (PMC6346636; doi:10.3389/fpsyt.2018.00730), 2019-01-18
Supplement: Image_1.pdf [file Image_1.pdf]

**Supplementary Figure 1. Bacterial counts for male and female participants in the patient and control groups.**

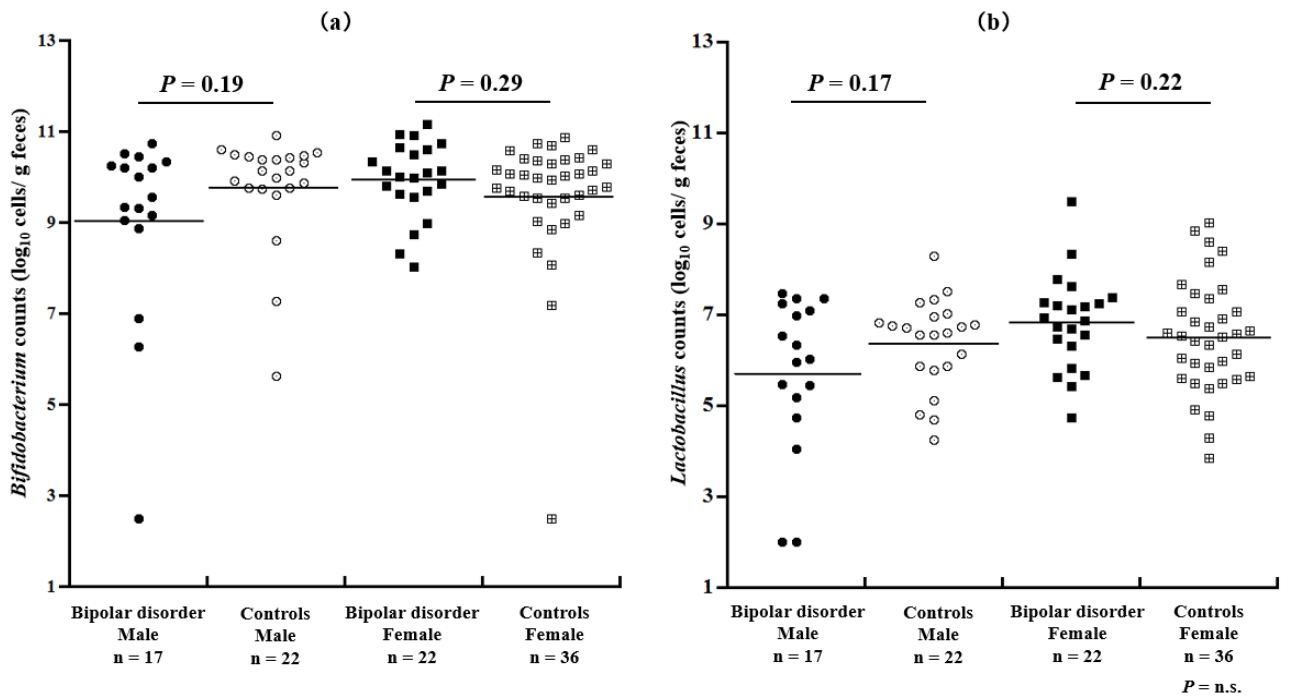

(a): *Bifidobacterium* counts. There was no significant difference in any of the comparisons. Male patients versus male controls ( $P = 0.19$ ); female patients versus female controls ( $P = 0.29$ ).

(b): *Lactobacillus* counts. There was no significant difference between male patients versus male controls ( $P = 0.17$ ), or female patients versus female controls ( $P = 0.22$ ).
