# Supplementary material for: Bifidobacterium and Lactobacillus Counts in the Gut Microbiota of Patients With Bipolar Disorder and Healthy Controls
Source: PubMed Central journal article supplement (PMC6346636; doi:10.3389/fpsyt.2018.00730), 2019-01-18
Supplement: Table_1.pdf [file Table_1.pdf]

**Supplemental Table 1. Correlations between bacterial counts and subscales of the depressive symptoms in the patient group.**

| HAM-D                  |          | core  | Sleep | Activity | Anxiety | Psychic-anxiety | Somatic-anxiety |
|------------------------|----------|-------|-------|----------|---------|-----------------|-----------------|
| <i>Bifidobacterium</i> | $\rho$   | -0.07 | -0.15 | -0.07    | 0.47    | -0.03           | 0.08            |
|                        | <i>P</i> | 0.68  | 0.39  | 0.69     | 0.79    | 0.86            | 0.65            |
| <i>Lactobacillus</i>   | $\rho$   | -1.0  | -0.45 | -0.12    | -0.09   | 0.04            | -0.14           |
|                        | <i>P</i> | 0.56  | 0.01* | 0.47     | 0.60    | 0.80            | 0.41            |

*Bifidobacterium* counts was no significant partial correlation (adjusted for age and sex) between bacterial counts and subscales of the depressive symptoms.

There was significant negative correlation between *Lactobacillus* counts and sleep (HAM-D subscale).
